1 **RNA-seq and Bulk Segregant Analysis of a Gene Related to High Growth in**

2 ***Ginkgo biloba* Half-sibling families**

3 Haixia Tang<sup>\*1</sup>, Jihong Li<sup>\*1</sup>, Shiyan Xing<sup>\*1</sup>, Shuhui Du<sup>\*1</sup>, Zhongtang Wang<sup>†2</sup>, Limin Sun<sup>\*1</sup>,

4 Xiaojing Liu<sup>\*1</sup>

5 \* Key Laboratory of Tree Germplasm Resources Research, College of Forestry,

6 Shandong Agricultural University, Tai'an, 271000, Shandong, China.

7 † Shandong Institute of Pomology, Tai'an, 271000, Shandong, China.

8 These authors contributed equally to this work: Haixia Tang and Jihong Li.

9

10

11

12

13

14

15

16

17

18

19

20

21

---

<sup>1</sup> 61, Daizong Street, Tai'an Shandong Province, China.

<sup>2</sup> 64, Longtan Road, Tai'an Shandong Province, China.

22 Running title: RNA-seq and BSA analysis of *G. biloba*

23 **Keywords:** High Growth, *Ginkgo biloba* Half-sibling families, RNA-seq and Bulk

24 Segregant Analysis, The transcriptome sequencing, Differentially expressed genes.

25 Corresponding author: Shiyan Xing, College of Forestry, Shandong Agriculture

26 University, Tai'an Shandong Province, China +86-538-8243903 [xingsy@sdau.edu.cn](mailto:xingsy@sdau.edu.cn)

27

28

29

30

31

32

33

34

35

36

37

38

39

40

41

42

43

44 **Abstract**

45 The lifetime of *G. biloba* is very long, and its growth is relatively slow. However,  
46 little is known about growth-related genes in this species. We combined mRNA  
47 sequencing (RNA-Seq) with bulked segregant analysis (BSA) to fine map significant  
48 agronomic trait genes by developing polymorphism molecular markers at the  
49 transcriptome level. RNA-Seq data provides BSA with genotype information in RNA  
50 Pool to screen out linked genes (low in false positives) after data analysis, and the  
51 efficiency of development and verification of the linked polymorphism marker is  
52 greatly improved. This combined approach (named BSR) has been applied to plant  
53 transcriptome sequencing in sunflower, corn, wheat, and *Arabidopsis thaliana*. In this  
54 study, transcriptome sequencing of high growth (GD) and low growth (BD) samples  
55 of *G. biloba* half-sib families was performed. After assembling the clean reads, 601  
56 differential expression genes were detected and 513 of them were assigned functional  
57 annotations. Single nucleotide polymorphism (SNP) analysis identified SNPs  
58 associated with 119 genes in the GD and BD groups; 58 of these genes were  
59 annotated. This study provides molecular level data that could be used for seed  
60 selection of high growth *G. biloba* half-sib families for future breeding programs.

61 **Introduction**

62 *Ginkgo biloba* is a deciduous tree in the family Ginkgoaceae. It is the only species in  
63 China to survive the quaternary glacier and, as such, is recognized as a “living fossil”  
64 (Jacobs and Browner 2000). *G. biloba* has a very long lifetime, the leaf is fan-shaped,  
65 the tree is tall and straight, and its tolerance to drought and barren conditions has

66 made it a significant ornamental, greening, edible, medicinal (Kato-Noguchi *et al.*  
67 2013), and timber tree. In China, the cultivated area of *G. biloba* is more than 200000  
68 hm<sup>2</sup> and the number of trees has been estimated as 913000 (Xing 2014). *G. biloba*  
69 growth is relatively slow with the average increment of timber volume reaching its  
70 maximum at about 40 years (Yuan *et al.* 2002; Cao 2007). The tree is generally  
71 harvested for maximum timber volume at about 60 years (xing *et al.* 1993). Until now,  
72 most studies have focused on the physiology (Newcomer 1953; Echenard *et al.* 2008),  
73 phylogeny, (Zhang *et al.* 2015; Guo and Chen 2005), and sex-determining mechanism  
74 (Liao *et al.* 2009), and molecular biology studies about the growth mechanism of *G.*  
75 *biloba* are relatively few. The genome sequence of *G. biloba* is still unavailable;  
76 therefore, genomics studies are relatively difficult. mRNA sequencing (RNA-Seq) is a  
77 next-generation sequencing technology (Cloonan *et al.* 2008; Fu *et al.* 2009; Tang *et al.*  
78 2009; Wilhelm and Landry 2009) that has been used widely to authenticate and  
79 quantify normal and rare transcripts, and to provide transcript sequential structure  
80 information of specific samples (Liu 2010; Maher *et al.* 2009) in species without a  
81 reference genome. The recent application of RNA-Seq to *G. biloba* aseptic seedlings  
82 identified a gene that encoded chalcone isomerase (GbCHI1), one of the key enzymes  
83 in the flavonoid biosynthesis pathway, that exhibited differences in the protein  
84 sequence compared with a previously identified GbCHI (Han *et al.* 2015).  
85 Transcriptome sequencing of *G. biloba* kernels revealed 66 unigenes that were found  
86 to be responsible for terpenoid backbone biosynthesis (He *et al.* 2015). In addition, *G.*  
87 *biloba* genes associated with the biosynthesis of bilobalide and paclitaxel were found

88 by transcriptome sequencing (Zhang *et al.* 2013). Transcriptome sequencing of the  
89 epiphyllous ovules of *G. biloba* var. *epiphylla* identified snRNA genes associated  
90 with the adjustment and control of ovular development (Zhang *et al.*2015). However,  
91 no studies into high growth-related genes in *G. biloba* have been reported so far. The  
92 growth of *G. biloba* can be affected by a combination of the environment, inheritance,  
93 and other factors (Ge *et al.* 2003; Zhang *et al.*2001); therefore, we aimed to study  
94 growth-related genes in a large group of *G. biloba* plants to obtain a comprehensive  
95 overview of the genes involved.

96 We combined RNA-seq with bulked segregant analysis (BSA) to fine mapping genes  
97 associated with significant agronomic traits gene at the transcriptome level. BSA has  
98 been used to rapidly identify genetic markers linked to a genomic region associated  
99 with a selected phenotype (Michelmore *et al.* 1991; Maren *et al.*2013). The  
100 fundamental principle of BSA is that extreme differences of individual phenotype or  
101 genotype can be used as the basis on which individuals are selected to obtain a DNA  
102 mixture, so that two DNA pools equivalent to near-isogenic line can be built. BSA  
103 can be used for efficient marker enrichment in a target region (Bauer *et al.*1997). BSA  
104 has been used for a wide range of plant genomic applications, such as genome  
105 sequencing in barley (Steuernagel *et al.*2009;Mackay and Caligari 2000), Arabidopsis  
106 (Wolyn *et al.*2004), rice (Duan *et al.*2003), corn (Tang *et al.* 2014), and sunflower  
107 (Maren *et al.*2013). In the combined technology (here named BSR), RNA-Seq is used  
108 to provide BSA with genotype data in the RNA pools. Linked genes (low in false  
109 positives) can be screened out after data analysis, which greatly improves the

110 efficiency of development and verification of linked polymorphism markers. For  
111 species with no reference genome, the RNA-Seq data are assembled to obtain  
112 unigenes that are subjected to a series of bioinformatics analysis, including genetic  
113 structure annotation, gene expression analysis, and gene function annotation.  
114 *G. biloba* half-sib families from a nursery stock at the seedling stage were used in this  
115 study. High growth (GD) and low growth (BD) RNA pools were built from the group  
116 level, and BSR was used to identify candidate genes related to the high growth trait.  
117 These data will expand the existing transcriptome resources of *G. biloba*, and provide  
118 a valuable platform for further studies on developmental and metabolic mechanisms  
119 in this species. The information can also be used for functional gene studies and  
120 molecular breeding programs.

## 121 **Results**

### 122 **Growth analysis and sample collection of *G. biloba* half-sib families**

123 The average seedling height of the GD group was more than the average height of the  
124 two groups for 2 consecutive years, while the average seedling height of the BD  
125 group was lower than the average height for 2 consecutive years (Fig. 1B). The  
126 photosynthetic rate (Pn), which reflects the speed of carbon dioxide fixation during  
127 photosynthesis, is shown in (Fig. 1C). The net Pn in the GD group ( $8.3 \mu\text{mol m}^{-2}\text{s}^{-1}$ )  
128 was more than the Pn ( $4.23 \mu\text{mol m}^{-2}\text{s}^{-1}$ ) in the BD group. The average chlorophyll  
129 content, which reflects photosynthetic capacity, was higher in the GD group ( $8.6$   
130  $\text{mg g}^{-1}\text{FW}$ ) than in the BD group ( $4.1 \text{mg g}^{-1}\text{FW}$ ) (Fig. 1D).

131

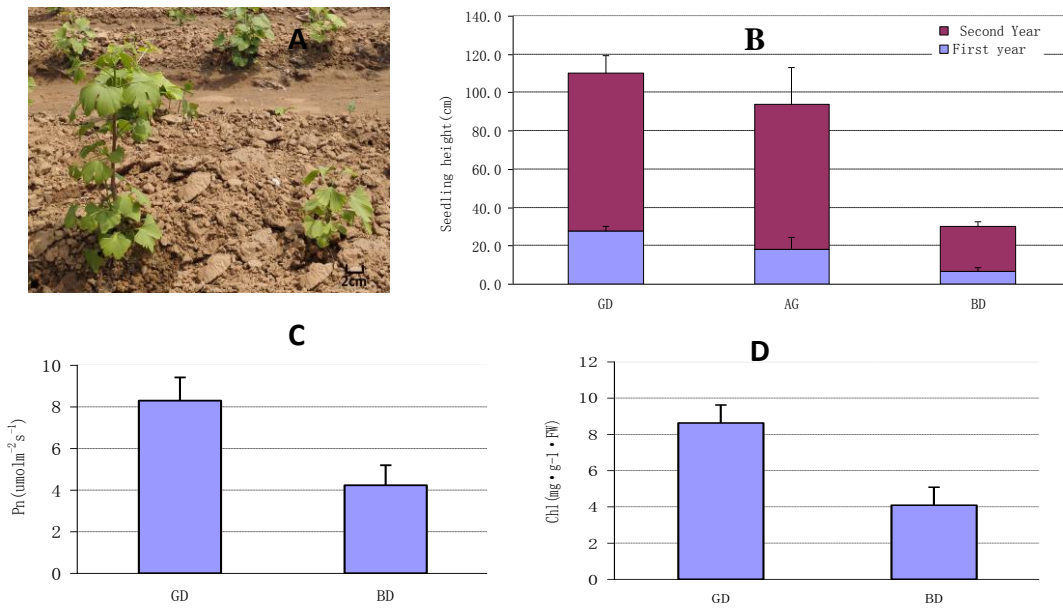

132 **Fig. 1** Growth traits of the high growth (GD) and low growth (BD) groups in the *G.*  
133 *biloba* half-sib families. (A) Seedlings in the GD and BD groups. (B) Average height  
134 of the seedlings in the GD and BD groups. The average seeding height of the GD  
135 group was 27.82 cm in the first year with a net increase of 82.37 cm in the second  
136 year; the average seeding height of the BD group was 6.63 cm in the first year with a  
137 net increase of 23.43 cm in the second year; AG is the average height of the two  
138 groups. (C) Net photosynthetic rate (Pn) in the GD and BD groups. (D) Average  
139 chlorophyll content in the GD and BD groups.

#### 140 **Illumina HiSeq mRNA sequencing**

141 After quality control of the RNA-Seq reads, we obtained 30 Gb of clean reads from  
142 the GD and BD groups; the Q30 basic group ratios were more than 90% (Table 1).

143 The clean reads were assembled using Trinity software (Grabherr *et al.* 2011), and a

144 total of 180402 single transcripts and 142492 unigenes are obtained. Of these, 77069

145 unigenes (27.11% of the total number) were 300–500 bp long, and 18.15% and 15.16%

146 were 500–1000 bp and 1000–2000 bp long, respectively. The N50 of single  
147 transcripts was 1514 bp and the N50 of the unigenes was 1081 bp, indicating that the  
148 integrity of the assembly was reasonably high (Fig. 2).

149 **Table 1** Statistics of the *G. biloba* half-sib families transcriptome sequencing data

| Samples | Clean reads<br>(bp) | Clean data<br>(bases) | GC content | Percent $\geq$ Q30 |
|---------|---------------------|-----------------------|------------|--------------------|
| GD      | 121909823           | 30477455750           | 44.93%     | 92.16%             |
| BD      | 122947833           | 30736958250           | 45.15%     | 91.95%             |

150 Samples: GD, high growth group, BD, low growth group. Clean reads: total number  
151 of pair-end reads in the clean data. Clean data: total number of bases in the clean data.  
152 GC content: GC content of the clean reads. Percent  $\geq$ Q30: percentage of clean data  
153 with a quality score greater than or equal to 30 (i.e., the probability that base is called  
154 incorrectly is 1 in 1000).

155 The assembled unigenes were annotated using Clusters of Orthologous Groups (COG)  
156 (Tatusov *et al.* 2000), Eukaryotic Orthologous Groups (KOG) (Koonin *et al.* 2004),  
157 protein family (Pfam) (Finn *et al.* 2013), Gene Ontology (GO) (Ashburner *et al.* 2000),  
158 Kyoto Encyclopedia of Genes and Genomes (KEGG) (Kanehisa *et al.* 2004),  
159 SwissProt protein sequence (SwissProt) (Apweiler *et al.* 2004), and the NCBI  
160 non-redundant protein sequence (Nr) (Deng *et al.* 2006) and nucleotide sequence (Nt)  
161 (<http://blast.ncbi.nlm.nih.gov/Blast.cgi>) databases. The annotation statistics are listed  
162 in Table 2. The E-value for the searches against each of the databases was set as  
163  $\leq 1e^{-5}$ . A total of 41758 (29.3%) unigenes were annotated in at least one of the



164 databases; the remaining 137734 unigenes (60.7%) were not annotated, indicating that  
 165 *G. biloba* genetic information is deficient in the existing databases. The Nr database  
 166 produced the highest number of annotated unigenes (38991), while KEGG produced  
 167 the least (5821).

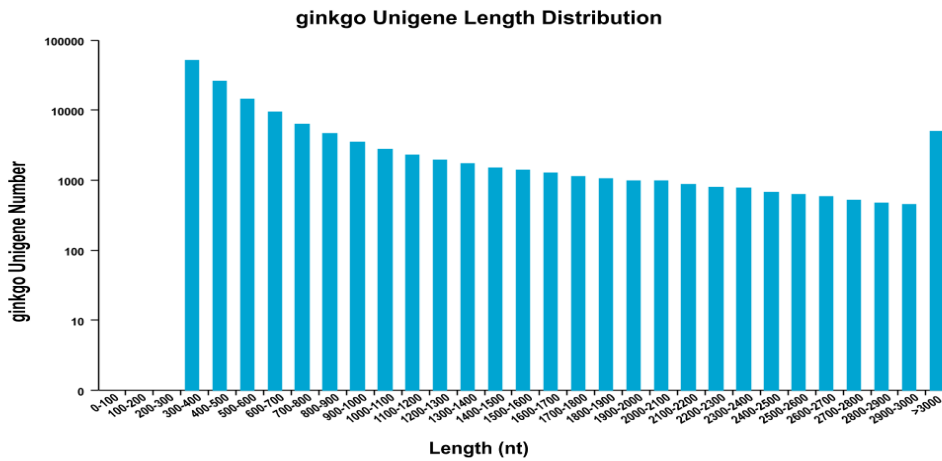

168 **Fig. 2** Length distribution of *G. biloba* half-sib families unigenes in the high growth  
 169 (GD) and low growth (BD) transcriptomes.

170 **Table 2** Annotation statistics of the *G. biloba* half-sib families unigene

| Databases | Unigenes | $\geq 300$ bp <sup>a</sup> | $\geq 1000$ bp <sup>b</sup> |
|-----------|----------|----------------------------|-----------------------------|
| COG       | 11719    | 4489                       | 7230                        |
| KOG       | 24483    | 13310                      | 11173                       |
| Pfam      | 21149    | 6775                       | 14374                       |
| GO        | 20002    | 8987                       | 11015                       |
| KEGG      | 5821     | 1755                       | 4066                        |
| SwissProt | 22705    | 9654                       | 13051                       |
| TrEMBL    | 38598    | 20023                      | 18575                       |

|    |       |       |       |
|----|-------|-------|-------|
| Nr | 38991 | 20416 | 18575 |
| Nt | 22101 | 7394  | 14707 |

171 <sup>a</sup>≥300 bp indicates the number of annotated unigenes ≥300 bp long. <sup>b</sup>≥1000 bp  
172 indicates the number of annotated unigenes ≥1000 bp long.

173 **Expression analysis of differentially expressed genes of the *G. biloba* half-sib**  
174 **families**

175 False discovery rate (FDR) values were adopted as a key index of differentially  
176 expressed genes (DEGs) to reduce false positives that may be caused by independent  
177 statistical hypothesis testing of expression values of a large number of genes. FDR  
178 values <0.05 and the differential multiple fold changes (FC) ≥2 between two groups  
179 were used as the cutoff to identify DEGs. A scatter plot of gene expression levels in  
180 the GD and BD groups shows that most of the points fell on the diagonal (Fig. 3A),  
181 indicating that the gene expression trends were similar in the two groups and the  
182 repetition correlation was high. A volcano plot of the differential gene expression  
183 between the BD and GD groups (Fig. 3B) shows that the number of genes with  
184 significant  $-\log$  FDR and FC values was more than the number of genes without  
185 significant  $-\log$  FDR and FC values, indicating that the screening was reliable. The A  
186 total of 601 DEGs were identified between the BD (control) and GD (test) groups;  
187 400 were up-regulated and 201 were down-regulated. Hierarchical clustering analysis  
188 of the DEGs showed that genes with the same or similar expression patterns clustered  
189 together (Fig. 3C).

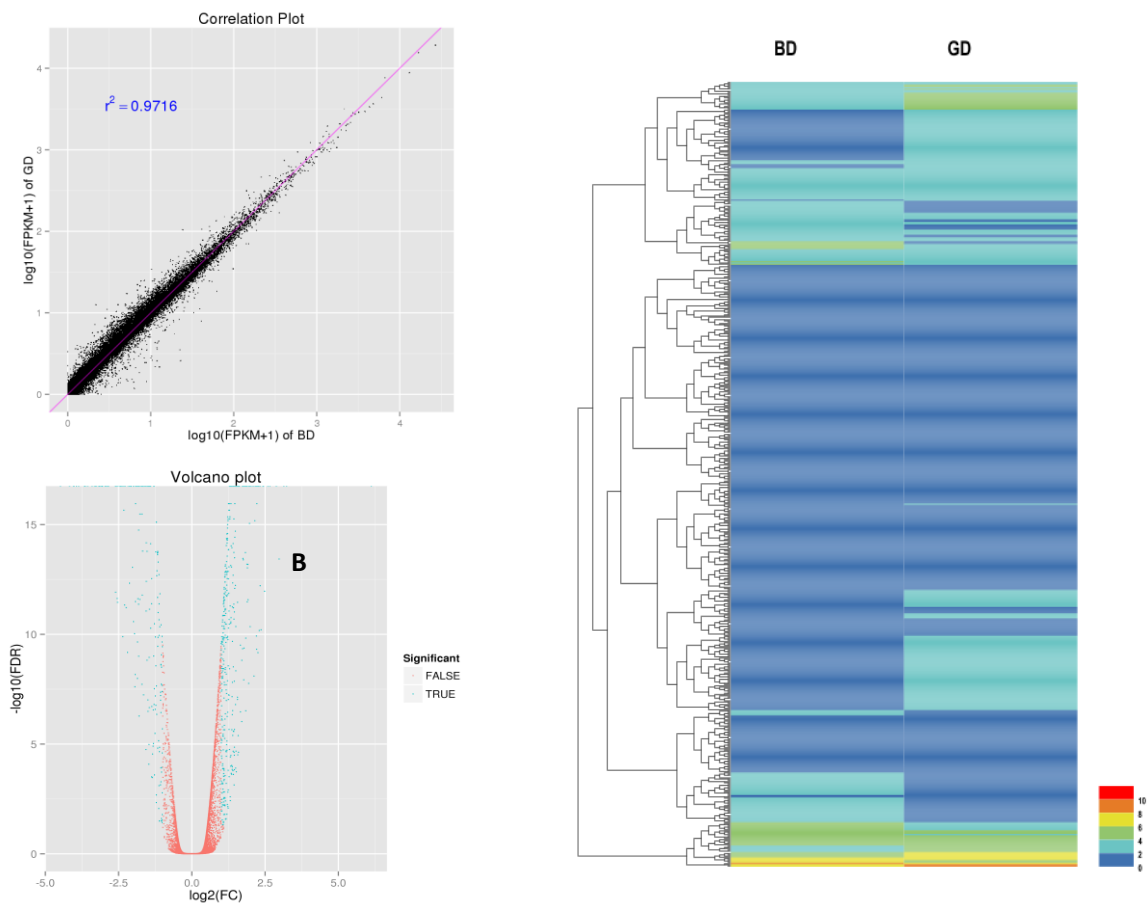

190

191 **Fig. 3** Analysis of gene expression in the high growth (GD) and low growth (BD)

192 transcriptomes. (A) Scatter diagram of gene expression levels in the GD and BD

193 groups. FPKM, fragments per kilobase of transcript per million mapped reads. (B)

194 Volcano plot of differential gene expression between the GD and BD groups. Green

195 indicates genes with significant  $-\log$  FDR and FC values; red indicates genes without

196 significant  $-\log$  FDR and FC values. FDR, false discovery rate; FC, fold change. (C)

197 Hierarchical clustering of DEGs with the same or similar expression patterns between

198 the BD (control) and GD (test) groups.

199 **Functional annotation of differentially expressed genes of *G. biloba* half-sib**

200 **families**

201 The second-level GO functional annotation terms assigned to the DEGs and to all the  
202 unigenes are shown in Fig. 4. Differences between the percentages of genes assigned  
203 to the different functions may be related to high growth. Under cellular component,  
204 “cell” (73, 6.3%), “cell part” (75, 6.4%), and “organelle” (55, 4.7%) were assigned to  
205 the highest number of genes; under molecular function, “catalytic activity” (124,  
206 10.6%) and “binding” (124, 10.6%) were assigned to the highest number of genes;  
207 and under biological process, “metabolic process” (169, 14.5%), “cellular  
208 process”(126, 10.8%), and “single-organism process” (91, 7.8%) were assigned to the  
209 highest number of genes. Among the 25 COG categories (Fig. 5), “Replication,  
210 recombination and repair” (39, 22.9%) and “General function prediction only” (39,  
211 22.9%) were assigned to the highest number of DEGs, followed by “Posttranslational  
212 modification, protein turnover, chaperones” (29, 17.1%) and “Transcription” (28,  
213 16.5%). The categories with the lowest number of DEGs were “Coenzyme transport  
214 and metabolism” (1, 0.59%), “Inorganic ion transport and metabolism” (2, 1.2%), and  
215 “Chromatin structure and dynamics” (2, 1.2%). None of the DEGs were assigned to  
216 “Nuclear structure”, “Defense mechanisms”, “Intracellular trafficking, secretion, and  
217 vesicular transport”, or “Nucleotide transport and metabolism”.

218 To explore the biological pathways in which the DEGs may be involved, we  
 219 performed a KEGG analysis (Fig. 6). Many DEGs were assigned to the Spliceosome,  
 220 Protein processing in endoplasmic reticulum, RNA transport, and Ubiquitin-mediated  
 221 proteolysis pathways. Splicing factors Prp22, Sm, SF3a, Prp6, P68, S164, Snu66,  
 222 CDC5, and THOC are known to participate in mRNA splicing and genes encoding  
 223 them were among the up-regulated genes in the GD group compared with BD group.  
 224 The protein responsible for endoplasmic reticulum-associated degradation (ERAD) is  
 225 related to *Hsp70* and *sHSF*, which were down-regulated in GD compared with BD.  
 226 Meanwhile, the genes encoding the ubiquitin-conjugating E2 enzyme (UBE20) and  
 227 the ubiquitin E3 ligase (ARF-BR1) associated with the proteasome were up-regulated  
 228 in GD compared with BD. Genes encoding the THOC2, Tpr, Nup62, eIF5B, and  
 229 eIF4G factors, which are involved in RNA transport, were up-regulated in GD

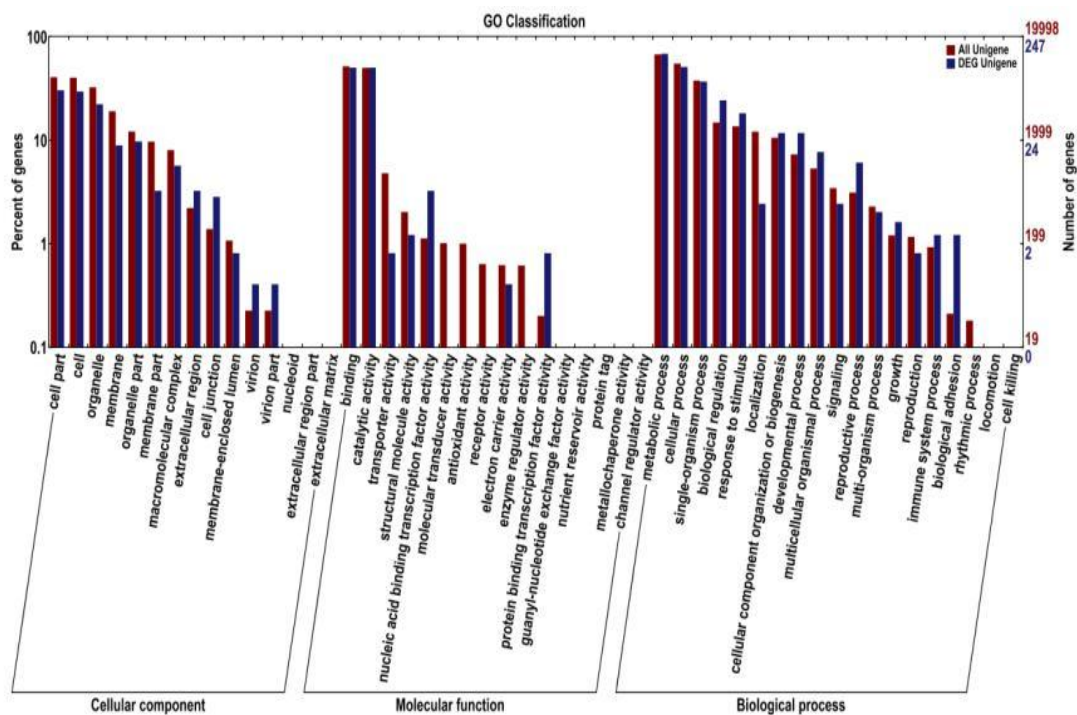

230 compared with BD.

231 **Fig. 4** Gene Ontology (GO) terms assigned to differentially expressed genes and all  
 232 unigenes in the *G. biloba* half-sib families transcriptomes. Second-level terms were  
 233 assigned under the three GO categories: cellular component, molecular function,  
 234 and biological process.

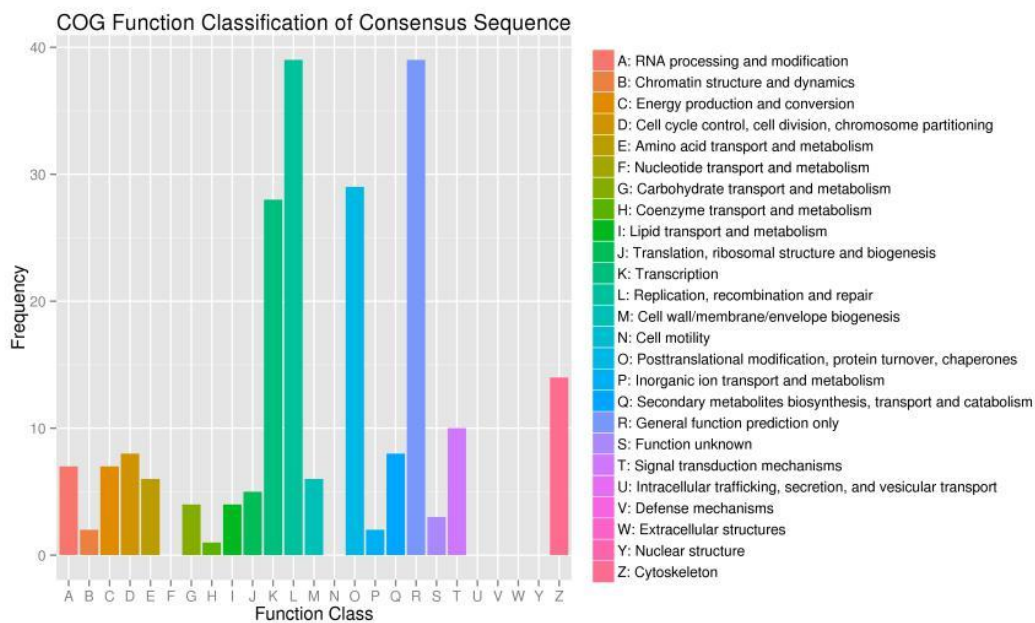

235 **Fig. 5** COG annotations assigned to differentially expressed genes in the *G. biloba*  
 236 half-sib families transcriptomes.

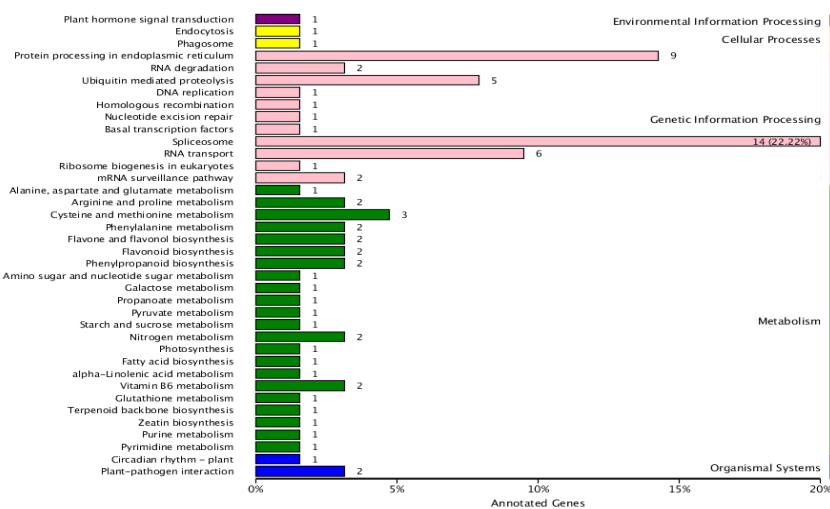

237 **Fig. 6** KEGG annotations of differentially expressed genes in the *G. biloba* half-sib  
238 families transcriptomes.

### 239 **Relevance of the predicted SNPs of *G. biloba* half-sib families**

240 The unigene sequences were compared with the known sequences in three protein  
241 sequence databases (Nr, SwissProt, and KEGG) and the protein-coding sequence  
242 (CDS) information from the matched sequences was used to annotate the unigenes.  
243 The CDSs were translated into amino acid sequences according to the standard codon  
244 table. The CDSs of unigenes that did not match any of the known protein sequences  
245 were predicted using the GetORF software  
246 (<http://embossgui.sourceforge.net/demo/getorf.html>), which translates nucleotide  
247 sequences in all six reading frames. The longest amino acid sequence for each  
248 unigene was selected as the translated protein sequence for that gene. The length  
249 distributions of the CDSs and predicted protein sequences of all the unigenes are  
250 plotted in Fig. 7.

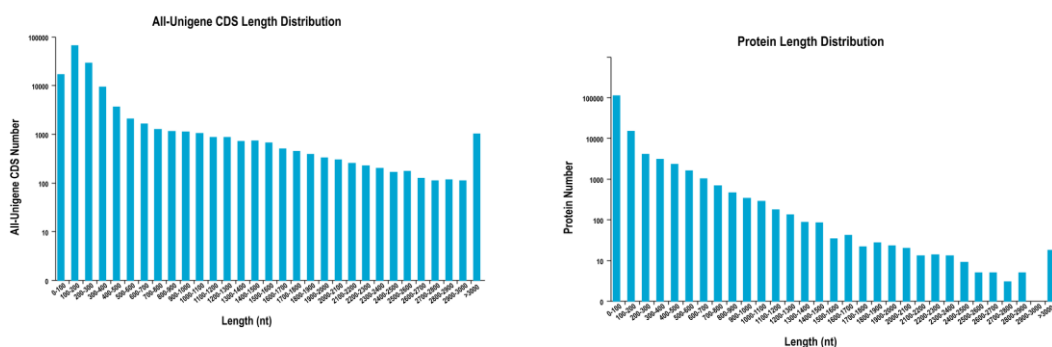

251 Fig. 7 Length distribution of the protein-coding sequences (CDSs) and translated  
252 amino acid sequences of all the unigenes in the *G. biloba* half-sib families  
253 transcriptomes.

254 The RNA-Seq reads from each group were compared with the assembled unigenes, to  
255 identify candidate single nucleotide polymorphisms (SNPs). A total of 115517 SNP  
256 loci were acquired. After filtering SNPs with a depth of less than 3 (21776) and  
257 undifferentiated loci (67859) between the CD and BD pools, 25883 SNP loci  
258 remained. SNP loci with ED<sup>5</sup> values (Euclidean distance) higher than the threshold  
259 value (set as 1.151) were regarded as outstanding correlative loci (Table S1). The  
260 number of genes associated with these SNPs was 119, of which 58 were annotated  
261 genes (Table S2). Of the 58 annotated genes, 31 had KOG annotations only under  
262 General function, Carbohydrate transport and metabolism, and Posttranslational  
263 modification, protein turnover and chaperones. Twenty-nine of the 58 genes were  
264 assigned GO terms. Under biological process, metabolic process (GO: 0008152),  
265 regulation of transcription, DNA-templated (GO: 0006355), and regulation of  
266 plant-type hypersensitive response (GO: 0010363) were highly represented; under  
267 cellular component, plasma membrane (GO: 0005886) and integral component of  
268 membrane (GO: 0016021) were highly represented; and under molecular function,  
269 binding (GO: 0005488) and metal ion binding (GO: 0046872) were highly  
270 represented (Table S3). The 58 genes were annotated with seven KEGG pathways,  
271 together with Protein processing in endoplasmic reticulum and Spliceosome, which  
272 were annotated to DEGs, Sphingolipid metabolism, Alanine, aspartate and glutamate  
273 metabolism and Carbon sequestration in photosynthetic organisms were also  
274 represented.

## 275 **Expression of high growth trait-related genes**



276 DEGs related to high growth in *G. biloba* half-sib families were predicted to  
277 participate in photosynthetic carbon sequestration. After photosynthetic carbon  
278 sequestration of CO<sub>2</sub>, reactive enzyme activation occurs through the glycolysis  
279 process. The correlation gene (*c28693\_gl\_il*) has a regulatory effect on the  
280 dehydrogenation and phosphorylation of 1,3-2-glyceric-acid phosphate to form  
281 glyceraldehyde 3-phosphate. This gene also participates in oxidoreductase activity,  
282 acting on the aldehyde or oxo group of donors, NAD or NADP as acceptor, and  
283 NADP binding activities. It has been shown that improvement of plasmalemma redox  
284 activity can promote elongation growth of plants (Qui *et al.*1985; Cao *et al.*1997). The  
285 Pn and growth rate of group GD were higher than those of group BD, which may be  
286 related to the activation of genes involved in the photosynthetic carbon sequestration  
287 process of *G. biloba*.

288 Sphingolipids play major roles in intracellular transduction (Merrill 2002) and  
289 participate in many important signal transduction processes, such as adjustment of  
290 cellular growth, differentiation, senility, and programmed cell death (Liu and Gou  
291 2009). Sphingolipid metabolism can be controlled by differential enzyme expression  
292 and is cell specific expression, and ceramidase has been implicated in different tissues  
293 (Riebding *et al.*2003). Ceramidase activity has been correlated with high growth,  
294 which indicates that sphingolipids in the GD group may be related to high growth. In  
295 addition, a related enzyme involved in the activity of splicing factor Prp22 and a  
296 correlation factor associated with the snRNA component were both up-regulated in  
297 the GD group. We speculate that the spliceosome-encoding gene may effectively

298 promote high growth in *G. biloba*.  
299 Endoplasmic reticulum-associated protein degradation eliminates denatured proteins,  
300 paraproteins or damaged proteins, plays a major role in controlling the quality of  
301 proteins. The KEGG pathway analysis revealed that ERAD was related to the  
302 down-regulated DEGs *Hsp70* and *sHSF*. It has been shown that degradation of ERAD  
303 substrate was coupled with the degradation pathway of ubiquitin-proteasomes (Hiller  
304 *et al.* 1996). The DEGs *E2 (UBE20)* and *E3 (ARF-BR1)* proteasome that participate in  
305 ubiquitin-mediated proteolysis were up-regulated in the GD group. The ERAD system  
306 can preferentially degrade specific proteins and effectively protect the immune system,  
307 suggesting that it may be related to the high growth of the *G. biloba* seedlings.

## 308 **Discussion**

309 For the BSA, the ED value of each SNP was calculated between the GD and PD RNA  
310 pools using the allele depth of the differentially occurring SNP, determine the target  
311 site, and conduct linked marker. A total of 119 genes were correlated with the  
312 identified SNPs, and 58 of them were assigned functional annotations. In Bulked  
313 Segregant Analysis and Amplified Fragment Length Polymorphism (BSA-AFLP)  
314 analysis of the resistance gene *rhm* of corn southern leaf blight, more than 222  
315 polymorphic markers were found in a F1-generation infection resistance pool (10  
316 plants in each pool); however, further verification found that in 80 single plants of the  
317 F2-generation, 16 of the markers were not linked with the target gene (Cai *et al.* 2003).  
318 A similar result has been reported in barley (Molna *et al.* 2000). It indicates that the  
319 non-linked marker can also present to polymorphic stripe of two pools. Although

320 these issues cannot be entirely eliminated, they can be reduced by increasing the  
321 number of single plants in the mixing pools. In the present study, 30 single plants  
322 were used in each mixing pool, which made up 30.9% of the total samples and  
323 reduced the number of non-linked markers that were identified. In addition, to ensure  
324 the veracity of the gene screening, expression analysis and identification of SNP loci  
325 were performed using the RNA-Seq data to detect growth-related genes and lay the  
326 foundation for fine mapping of these genes in the *G. biloba* half-sib families.

327 In most woody plants, heterozygosity is strong and the genomes tend to be large and  
328 complex; therefore, studies into the genetic background of these plants have been  
329 limited. For species without a reference genome, RNA-Seq data have been used to  
330 obtain inheritance information and to build physical maps (Li *et al.* 2010). *G. biloba*  
331 is an ancient gymnosperm that is widely distributed around the world and its ability to  
332 growth and adapt to different environmental conditions suggests that a large number  
333 of responsive genes would have evolved (Li 2011). Many genes and transcription  
334 factors related to growth and development of *G. biloba* are available in the related  
335 study of *G. biloba* leaves, for example, *COP9* signal corpuscle composite subunits,  
336 *AGAMOUS-like MADS-box* transcription factor (Shore and Sharrocks 1995), *glucan*  
337 *endo-1,3-beta-glucosidase* (Meirinho *et al.*2010), *DELLA*, *ELFB*, *homeobox-leucine*  
338 *zipper protein*, and *EMBRYONICFLOWER 2* (Lin *et al.*2010). Based on the  
339 expression levels of genes in different samples, 601 DEGs have been recognized and  
340 functional annotations have been assigned to 513 of them. Among them, two  
341 *Homeobox-leucine zipper protein genes* were up-regulated in the GD group compared

342 with the BD group; therefore, these are very likely related to high growth of *G. biloba*.  
343 In addition, the DEGs and the gene associated with BSR technology were found to be  
344 associated with spliceosome activity, spliceosome metabolism, photosynthetic carbon  
345 sequestration, and endoplasmic reticulum protein processing and also to participate in  
346 growth and metabolism of *G. biloba*.

## 347 **Materials and Methods**

### 348 **Genetic materials**

349 *G. biloba* seeds were obtained from the *G. biloba* germplasm resource garden of the  
350 Gaoqiao Tree Farm in Tai'an City, Shandong Province, China. The experimental field  
351 is located N 35°54', E 116°53', which has a continental warm temperature zone  
352 medium-latitude monsoon climate. The average annual temperature is 13.4°C, and the  
353 maximum and minimum recorded air temperatures are 40.7°C, and -19°C,  
354 respectively. The annual average rainfall is 689.6 mm, average annual evaporation is  
355 1169.8 mm, and the average number of frost-free days is 206 per year. The soil is  
356 sand loamy river moisture soil. A total of 358 seeds were collected in Shiqiao Town,  
357 Pan County, Guizhou Province on 29 September 2013. Seeding was conducted in  
358 2014 and 194 seedlings emerged. After planting, field management measures were  
359 uniform throughout. Seedling height was measured in December 2014 and November  
360 2015. The 30 tallest seedlings and 30 shortest seedlings were selected to form the GD  
361 and BD groups, respectively. The heights of the selected seedlings were recorded for  
362 2 consecutive years. The number of seedlings in the half-sib families group was 194,  
363 and the variable coefficient of seedling height in the families was >30%. The initial

364 expanded second lamina at the top of the seedlings in group GD and group BD were  
365 punched and then disposed in mixing pool mode in May 2015, then marked as GD or  
366 BD, quick-frozen in liquid nitrogen, and stored at  $-80^{\circ}\text{C}$  until used.

#### 367 **Extraction of RNA from *G. biloba* half-sib families leaf tablets**

368 Total RNA from each sample was isolated separately using a RN38 EASY spin plus  
369 Plant RNA kit (Aidlab Biotech, Beijing, China). Nanodrop Analyzer (Thermo Science,  
370 Wilmington, USA), Qubit 2.0 Fluorometer and Agilent 2100 Bioanalyzer (Agilent  
371 Technologies, Santa Clara, CA, USA) were used to estimate the purity, concentration,  
372 and integrity of the extracted RNA.

#### 373 **cDNA library construction and sequencing**

374 Total mRNA was isolated by oligo (dT) selection using Dynabeads mRNA DIRECT  
375 Kit (Invitrogen), and each sample was prepared 5  $\mu\text{g}$  for constructing the cDNA  
376 library. The purified mRNA was fragmented at elevated temperature ( $90^{\circ}\text{C}$ ), then  
377 reverse transcribed to first strand cDNA with random primer. Second strand cDNA  
378 was synthesized in the presence of DNA polymerase I and RNaseH. The cDNA was  
379 cleaned using Agencourt Ampure XP SPRI beads (Beckman Coulter). The cDNA  
380 molecules were subjected to end repair, and add an 'A' base at the 3'-end. Illumina  
381 adapters were ligated to the cDNA molecules, resultant cDNA library was amplified  
382 using PCR for enrichment of adapter ligated fragments. Libraries were prepared from  
383 a 400-500 bp size-selected fraction following adapter ligation and 2% agarose gel  
384 separation. The cDNA library was quantified using qPCR method ( $>10$  nM). It was  
385 then sequenced using the Illumina Hi-Seq2500 platform.

### 386 **Unigene function annotation**

387 The raw reads were cleaned by removing adapter sequences, reads containing ploy-N,  
388 and low-quality sequences ( $Q < 30$ ). Clean reads were aligned to the reference genome  
389 sequence using the program Tophat(Yang *et al.*2015;Rong *et al.*2015).

390 The assembled unigene sequences were searched against the Nr, SwissProt, GO, COG,  
391 KOG, Pfam, and KEGG databases using the NCBI Basic Local Alignment Search  
392 Tool (BLAST) tools (Altschul *et al.*1997) to annotate the unigenes.

### 393 **Unigene structural analysis**

394 The CDSs of the unigenes were predicted based on their alignment to known protein  
395 sequences. The predicted CDSs were translated into amino acid sequence using the  
396 standard codon table. The unassembled clean reads in each sample were mapped to  
397 the assembled unigene sequences. SNP loci were detected using the SNP calling  
398 program in the Genome Analysis Toolkit (GATK)  
399 (<https://www.broadinstitute.org/gatk/index.php>). SNP loci were screened then we  
400 chose to measure allele segregation using Euclidean distance (ED), as a metric that  
401 does not require parental strain in-formation and is resistant to noise(Jonathon T. et al.  
402 2013). In order to obtain good correlation effect, The ED value was disposed in the 5  
403 power mode, and the data were recognized as the basis for BSR relevance.Using the  
404 equation:

$$405 \quad ED = \sqrt{(A_{mut} - A_{wt})^2 + (C_{mut} - C_{wt})^2 + (G_{mut} - G_{wt})^2 + (T_{mut} - T_{wt})^2}$$

406 where each letter (A, C, G, T) corresponds to the frequency of its corresponding DNA  
407 nucleotide.

408 **Analysis of differential gene expression**

409 Reads is compared with Unigene bank obtained by sequencing of each sample using  
410 Bowtie software (Langmead *et al.*2009). The expression levels were estimated by  
411 combining with RSEM (Li and Colin 2011). RSEM (RNA-Seq by Expectation  
412 Maximization), which implements our quantification method and provides extensions  
413 to our original model. The expression levels of the unigenes were expressed as  
414 fragments per kilobase of transcript per million mapped reads (FPKM) values to  
415 eliminate the influences of gene length and sequencing quantity difference on of the  
416 estimate gene expression. FPKM values can be used directly to compare gene  
417 expression differences between samples.

418 FPKM was calculated as follows:

$$419 \text{ FPKM} = \frac{\text{cDNA Fragments}}{\text{Mapped Reads Millions} \times \text{Transcript Length kb}}$$

420 where “cDNA Fragments” is the number of fragments of one transcript in the sample  
421 (i.e., the number of double-end reads); “Mapped Reads Millions” is the number of  
422 mapped reads (in this study it was 106); and “Transcript Length kb” is the length of  
423 the transcript.

424 Differential expression analysis between the GD and BD groups was conducted using  
425 DESeq (Anders and Huber 2010). Significance p-values were obtained by original  
426 hypothesis testing and adjusted using the Benjamini–Hochberg method. The FDR was  
427 used as the key index for screening the DEGs, and the screened DEGs were analyzed  
428 in a hierarchical clustering mode.

429 **Data Availability:** The raw reads of the RNA-seq are now beening processed by

430 NCBI staff. File S1 contains SNP depth in the RNA-Seq data of *Ginkgo biloba*  
431 half-sib families. File S2 contains functional annotation of unigenes of *Ginkgo biloba*  
432 half-sib families. File S3 contains Gene Ontology annotation of unigenes of *Ginkgo*  
433 *biloba* half-sib families.

#### 434 **Acknowledgments:**

435 We thank Rongkai Wang, for constructive criticism and suggestions, Haidong Gao,  
436 for experimental operation and the data analysis, and Shuhui Du, for the Paper  
437 modified. This work was supported by National Science and Technology Support  
438 Plan (2012BAD21B04), Shandong Agricultural Seeds Engineering Project: LuNong  
439 good word [2011] no. 7, National Plant Germplasm Resources Sharing Platform -  
440 National Forest Tree Germplasm Resources (including bamboo rattan flower)  
441 Platform (platform subsystem) : 2013-39.

#### 442 **Author Contributions:**

443 Conceived and designed the experiments: SYX, JHL and HXT. Performed the  
444 experiments: HXT and JHL. Analyzed the data:SHD, HXT, ZTW , LMS, XJL. Wrote  
445 the paper: HXT, JHL and SYX.

#### 446 **Literature Cited**

447 Jacobs B P,Browner W S,2000 *Ginkgo biloba*:a living fossil.The American  
448 Journal of Medicine.3: 341-342.

449 Kato-Noguchi H, Takeshita S, Kimura F, Ohno O, Suenaga K, 2013 A novel  
450 substance with allelopathic activity in *Ginkgo biloba*. J Plant Physiol.  
451 170:1595-1599.



- 452 Zhou Z, Zheng S ,2009 Palaeobiology: The missing link in Ginkgo evolution.  
453 Nature . 423: 821- 822.
- 454 Xing S Y,2014 Ginkgo Germplasm Resources In China .Beijing:Chinese  
455 Forestry Press.
- 456 Yuan J,Li Q,Xiao G L.et al, 2002 Discussion on the utilization and  
457 development of ginkgo wood. China Forestry Science and Technology.  
458 16:6-8,23.
- 459 Cao F L,2007 Chinese ginkgo records.Beijing:Chinese Forestry Press .
- 460 Xing s y et al,1993 Study on the quality of the fine single plant of Ginkgo  
461 biloba. Deciduous Fruits .15-18.
- 462 Newcomer E. H.,1954 The karyo type and possible sex chromosomes of  
463 Ginkgo biloba. Amer J Bot.41:542-545.
- 464 Echenard V.,Lefort F.,Calmin G.,Perroulaz R and Belhahri L.,2008 A New and  
465 improved automated technology for early sex determination of Ginkgo biloba.  
466 Arboriculture & Urban Forestry .34:300-307.
- 467 Zhang Q, Li J, Sang Y, Xing S, Wu Q, Liu X,2015 Identification and  
468 Characterization of MicroRNAs in Ginkgo biloba var. epiphylla Mak. PLoS  
469 ONE .10: e0127184.
- 470 Guo C L,Chen L G,2005 Expressions of LEAFY Homologous Genes in  
471 Different Organs and St. Hereditas .27:241-244.
- 472 Liao L Q,Liu J,Dai Y X,Li Q,Xie M,*et al.*,2009 Development and application of  
473 SCAR markers for sex identification in the dioeciously species Ginkgo biloba

- 474 Euphytica. .16:49-55.
- 475 Cloonan N, Forrest AR, Kolle G, Gardiner BB, Faulkner GJ, et al.,2008 Stem  
476 cell transcriptome profiling via massive-scale mRNA sequencing. Nat  
477 Methods.5: 613-619.
- 478 Fu X, Fu N, Guo S, Yan R Z, Xu Y, et al.,2009 Estimating accuracy of RNA-Seq  
479 and microarrays with proteomics. BMC Genomics. 10:161.
- 480 Tang F, Barbacioru C, Wang Y, Nordman E, Lee C, et al.,2009 mRNA-Seq  
481 whole-transcriptome analysis of a single cell. Nat Methods .6:377-382.
- 482 Wilhelm B T, Landry J R , 2009 RNA-Seq-quantitative measurement of ex-  
483 pression through massively parallel RNA-sequencing. Methods .48:249-257.
- 484 Liu S, Chen H D, Makarevitch I, Shirmer R, Emrich SJ, *et al.*,2010 High-  
485 throughput genetic mapping of mutants via quantitative single nucleotide  
486 polymorphism typing. Genetics.184:19-26.
- 487 Maher CA, Kumar-Sinha C, Cao X, Kalyana-Sundaram S, Han B, et al.,2009  
488 Transcriptome sequencing to detect gene fusions in cancer. Nature .458:97  
489 -101.
- 490 Shiming Han, Zhenjiang Wu, Ye Jin, et al.,2015 RNA-Seq analysis for  
491 transcriptome assembly, geneidentification, and SSR mining in ginkgo  
492 (*Ginkgo biloba* L.).Tree Genetics & Genomes. 11: 37
- 493 Bing He, Yincong Gu, Meng Xu, et al.,2015 Transcriptome analysis of Ginkgo  
494 biloba kernels. Frontiers in Plant Science Sci. 6:819. doi: 10.3389/fpls.00819
- 495 Zhang N, Sun G L ,Dai J G,et al.,2013 Sequencing and Analysis of the

- 496 Transcriptome of ginkgo biloba .Cells.China Biotechnology.33:112-119.
- 497 Ge Y Q ,Qiu Y X ,Ding B Y,et al.,2003 An ISSR analysis on population genetic  
498 diversity of the relict plant Ginkgo biloba .Biodiversity Science .11:276-287.
- 499 Zhang Y Y,Ma Ch G, Lin M J.et al.,2001 Study on one of genetic variations for  
500 ginkgo biloba in china the variation of breeding fruit-stone characters among  
501 and within population.Scientia Silvae Sinicae. 37:35-40.
- 502 Michelmore RW, Paran I and Kesseli RV ,1991 Identification of markers  
503 linked to disease-resistance genes by bulked segregant analysis: a rapid  
504 method to detect markers in specific genomic regions by using segregating  
505 populations. Proc Natl Acad Sci USA .88: 9828–9832.
- 506 Maren Livaja, Yu Wang and Silke Wieckhorst,2013 BSTA: a targeted approach  
507 combines bulked segregant analysis with next- generation sequencing and de  
508 novo transcriptome assembly for SNP discovery in sunflower. BMC  
509 genomics .14:628.
- 510 Bauer E, Weyen J, Schiemann A, Graner A and Ordon F,1997 Molecular  
511 mapping of novel resistance genes against Barley Mild Mosaic Virus  
512 (BaMMV).Theor Appl Genet.95:1263-1269.
- 513 Steuernagel B, Taudien S, Gundlach H, Seidel M, Ariyadasa R, *et al.*,2009 De  
514 novo 454sequencing of barcoded BAC pools for comprehensive gene survey  
515 and genome analysis inthe complex genome of barley. BMC enomics. 10:547.
- 516 Mackay I. J. , Caligari P.D.S.,2000 Efficiencies of F2 and backcross generations  
517 orf bulked segregant analysis using dominant markers,Crop Science.

518 40:626-630.

519 Wolyn DJ, Borevitz JO, Loudet O, Schwartz C, Maloof J, *et al.*,2004,  
520 Light-response quantitative trait loci identified with composite interval and  
521 extreme array mapping in *Arabidopsis thaliana*.*Genetics* .167:907-917.

522 Duan Y, Li W, Wu W, Pan R, Zhou Y, *et al.*, 2003 Genetic analysis and  
523 mapping of gene *fzp(t)* controlling spikelet differentiation in rice. *Science in*  
524 *china*.46: 328-334.

525 Tang H M, Liu S Z ,Sarah Hill-Skinner. *et al.*,2014 The maize brown midrib2  
526 (*bm2*) gene encodes a methylenetetrahydrofolate reductase that contributes to  
527 lignin accumulation.*The Plant journal* .77:380-392.

528 Grabherr MG, Haas BJ, Yassour M.*et al.*,2011 Full length transcriptome  
529 assembly from RNA Seq data without a reference genome. *Nature*  
530 *Biotechnology*. 29: 644-652.

531 Tatusov R L, Galperin M Y and Natale D A,2000 The COG database: a tool for  
532 genome scale analysis of protein functions and evolution. *Nucleic Acids*  
533 *Research*. 28:33-36.

534 Koonin EV, Fedorova ND, Jackson JD, *et al.*,2004 A comprehensive  
535 evolutionary classification of proteins encoded in complete eukaryotic  
536 genomes. *Genome biology* .5: R7.

537 Finn RD, Bateman A, Clements J, *et al.*,2013 Pfam: the protein families  
538 database. *Nucleic acids research*. gkt1223.

539 Ashburner M, Ball C A, Blake J A, *et al.*,2000 Gene ontology: tool for the

540 unification of biology. *Nature genetics* .25: 25-29.

541 Kanehisa M, Goto S, Kawashima S, et al., 2004 The KEGG resource for  
542 deciphering the genome. *Nucleic Acids Research*.32(Database issue):D277  
543 -D280.

544 Apweiler R, Bairoch A, Wu CH, *et al.*,2004 UniProt: the Universal Protein  
545 knowledgebase. *Nucleic Acids Research*. 32(Database issue):D115-9.

546 Deng Y Y, Li JQ, Wu S F, et al.,2006 Integrated nr Database in Protein  
547 Annotation System and Its Localization. *Computer Engineering*. 32:71-74.  
548 <http://blast.ncbi.nlm.nih.gov/Blast.cgi>  
549 <http://embossgui.sourceforge.net/demo/getorf.html>

550 Qui Z S, Rubinstein B and Stern A I,1985 Evidence for electron transport across  
551 plasma membrane of Zea mays root cells. *Physiol Plant* .80:805-811.

552 Cao C L, Lin Y, Lu J Y and Lei J J,1997 Roles of Plasma Membrane Redox  
553 System in Elongation Growth of Plants. *Acta Univ. Agric. Boreali-Occidentalis*.  
554 25:46-50.

555 Merrill AH Jr,2002 De novo sphingolipid biosynthesis: a necessary, but  
556 dangerous, pathway. *J Biol Chem* .277:25843-25846.

557 Liu S H, Gou P,2009 Progress in Sphingolipids Research. *Biotechnology*.  
558 19:96-98.

559 Riebling C, Allegood JC, Wang E, et al.,2003 Two mammalian longevity  
560 assurance gene (LAGI) family members, trh1 and trh4, regulate  
561 dihydroceramide synthesis using different fatty acyl-CoA donors. *J Biol Chem* .

562 278:43452-43459.

563 Hiller M M, Finger A, Schweiger M, et al., 1996 ER degradation of amylase  
564 lumenal poretin by the cytosolic ubiquitin-proteasome pathway. *Science*.  
565 273:1725-1728.

566 Liang Y, Chen Sh Y and Liu G S, 2011 Application of next generation  
567 sequencing techniques in plant transcriptome. *Hereditas*. 33:1317-1326.

568 Jiang X M, Wu Y F, Xiao F M, et al., 2014 Transcriptome analysis for leaves of  
569 five chemical types in *Cinnamomum amomum*. *Hereditas*. 36:58-68.

570 Cai H.W., Gao Z.S., Yuyama N., and Ogawa N., 2003 Identification of AFLP  
571 markers closely linked to the *rhm* gene for resistance to Southern corn leaf  
572 blight in maize by using bulked segregant analysis. *Genomics*. 269:299-303.

573 Molnar S.J., James L.E., and Kasha K.J., 2000 Inheritance and RAPD tagging  
574 of multiple genes for resistance to net blotch in barley. *Genome*. 43:224-231.

575 Li X, Chen GH, Zhang WY and Zhang X, 2010 Genome-wide transcriptional  
576 analysis of maize endosperm in response to *ae wx* double mutations. *J Genet*  
577 *Genomics*. 37: 749-762.

578 Li X, 2011 The transcription and chloroplast genome and related studies of the  
579 *Ginkgo biloba* and *Magnolia*. [Ph.D. Dissertation]. Beijing: Graduate School of  
580 PUMC.

581 Shore P, Sharrocks A D, 1995 The MADS-box family of transcription factors.  
582 *Eur J Biochem*. 229: 1-13.

583 Meirinho S, Carvalho M, Dominguez A and Choupina A, 2010 Isolation and

584 characterization by asymmetric PCR of the ENDO1 gene for glucan  
585 endo-1,3-(3-D-glucosidase in *Phytophthora cinnamomi* associated with the  
586 ink disease of *Castanea sativa* Mill. *Braz Arch Biol and Techn.* 53:513-518.

587 Lin X H , Zhang J and Li Y,2011 Functional genomics of a living fossil tree,  
588 Ginkgo, based on next-generation sequencing technology.*Physiologia*  
589 *Plantarum.* 143:207-218.

590 Mei Yang, Lingping Zhu,, Cheng Pan, Liming Xu, Yanling Liu,*et al.*,2015  
591 Transcriptomic Analysis of the Regulation of Rhizome Formation in  
592 Temperate and Tropical Lotus (*Nelumbo nucifera*),*Scientific Reports.* DOI:  
593 10.1038/srep13059.

594 Liping Rong, Qianzhong Li, Shushun Li, Ling Tang, Jing Wen,2015 De novo  
595 transcriptome sequencing of *Acer palmatum* and comprehensive analysis of  
596 differentially expressed genes under salt stress in two contrasting genotypes.  
597 *Mol Genet Genomics.*DOI 10.1007/s00438-015-1127-2.

598 Altschul S F, Madden T L, Schäffer AA, et al.,1997 Gapped BLAST and PSI  
599 BLAST: A New Generation of Protein Database Search Programs. *Nucleic*  
600 *Acids Research* .25: 3389 -3402.

601 <https://www.broadinstitute.org/gatk/index.php>

602 Jonathon T, Hill, et al., 2013 MMAPPR: Mutation Mapping Analysis Pipeline  
603 for Pooled RNA-seq. *Genome Research.* 23(4):687-697.

604 Langmead B, Trapnell C, Pop M, et al., 2009 Ultrafast and memory-efficient  
605 alignment of short DNA sequences to the human genome. *Genome Biology.*

606 10(3): R25.

607 Li B, Colin ND,2011 RSEM: Accurate transcript quantification from RNA-Seq

608 data with or without a reference genome. BMC Bioinformatics. 12:323.

609 Anders S, Huber W,2010 Differential expression analysis for sequence count

610 data. Genome Biology .11:R106.
